# Supplementary material for: Complete Profiling of Methyl-CpG-Binding Domains for Combinations of Cytosine Modifications at CpG Dinucleotides Reveals Differential Read-out in Normal and Rett-Associated States
Source: PubMed Central journal article supplement (PMC7055227; doi:10.1038/s41598-020-61030-1), 2020-03-04
Supplement: 41598_2020_61030_MOESM1_ESM.pdf [file 41598_2020_61030_MOESM1_ESM.pdf]

# Supporting Online Information

## **Complete Profiling of Methyl-CpG-Binding Domains for Combinations of Cytosine Modifications at CpG Dinucleotides Reveals Differential Read-out in Normal and Rett-Associated States**

Benjamin C Buchmüller<sup>a</sup>, Brinja Kosel<sup>a</sup> and Daniel Summerer<sup>a\*</sup>

---

<sup>a</sup>Department of Chemistry and Chemical Biology

Technical University of Dortmund

CP-02-143

Otto-Hahn-Str. 4a

44227 Dortmund

\*to whom correspondence should be addressed: [Daniel.Summerer@tu-dortmund.de](mailto:Daniel.Summerer@tu-dortmund.de)

## Table of Contents

|                                                                                                               |    |
|---------------------------------------------------------------------------------------------------------------|----|
| Table of Contents .....                                                                                       | 2  |
| Supplementary Figures .....                                                                                   | 3  |
| Supplementary Figure 1. Selectivity measurements for human MBD1[2–81].....                                    | 3  |
| Supplementary Figure 2. Selectivity measurements for human MBD2[145–225].....                                 | 4  |
| Supplementary Figure 3. Selectivity measurements for human MBD3[2–81].....                                    | 5  |
| Supplementary Figure 4. Selectivity measurements for human MBD4[76–167].....                                  | 6  |
| Supplementary Figure 5. Selectivity measurements for human MeCP2[90–181].....                                 | 7  |
| Supplementary Figure 6. Selectivity measurements for human MeCP2[90–181]L124F. ....                           | 8  |
| Supplementary Figure 7. Selectivity measurements for human MeCP2[90–181]R133C. ....                           | 9  |
| Supplementary Figure 8. Selectivity measurements for human MeCP2[90–181]S134C.....                            | 10 |
| Supplementary Figure 9. Selectivity measurements for human MeCP2[90–181]T158M. ....                           | 11 |
| Supplementary Figure 10. Altered selectivity profiles of MeCP2 Rett mutants at low protein concentration..... | 12 |
| Supplementary Figure 11. Affinity measurements of MeCP2 Rett mutants (Representative EMSA gel images).....    | 13 |
| Supplementary Figure 12. Affinity measurements of MeCP2 Rett mutants (Fitted curves)....                      | 14 |
| Supplementary Figure 13. Sample plasmid map of pBeB1380 with hMBD1[2–81].....                                 | 13 |
| Supplementary Figure 14. Effect of TEV cleavage on SpA(Z)-MBD fusion proteins.....                            | 16 |
| Supplementary Tables.....                                                                                     | 17 |
| Supplementary Table 1. Plasmids.....                                                                          | 17 |
| Supplementary Table 2. Oligodeoxynucleotides for plasmid construction. ....                                   | 17 |
| Supplementary Table 3. MBD protein sequences. ....                                                            | 19 |
| Supplementary Table 4. Oligodeoxynucleotides (ODNs) for EMSA.....                                             | 20 |
| Supplementary Table 5. ODN pairs for EMSA. ....                                                               | 21 |
| Supplementary Table 6. Fit statistics. ....                                                                   | 22 |

## Supplementary Figures

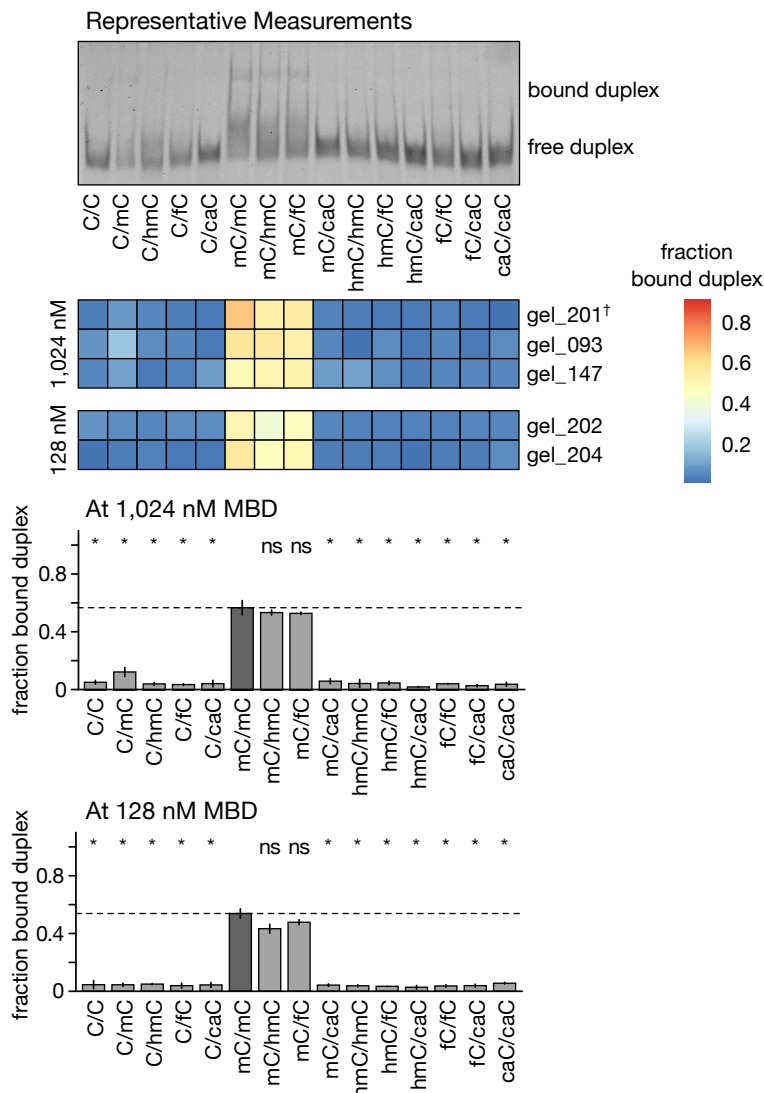

**Supplementary Figure 1. Selectivity measurements for human MBD1[2–81].** A representative EMSA gel image at 1,024 nM MBD protein concentration is shown in the top panel; representative single measurements of the fraction of bound labelled DNA duplex are displayed as a heatmap in the mid panels († indicates the EMSA gel image shown) and summarized (mean) as bar graphs in the lower panels at high and low MBD protein concentration. Error bars indicate standard error of the mean with two-sided Student's *t*-test against the fraction of bound mC/mC duplex (dark gray); false-discovery rate was controlled using the Benjamini-Hochberg procedure to correct the *p*-values for multiple comparisons (ns: *p* in (0.1, 1], . (0.05, 0.1], \* (0.01, 0.05], \*\* (0.001, 0.01], \*\*\* [0, 0.001]).

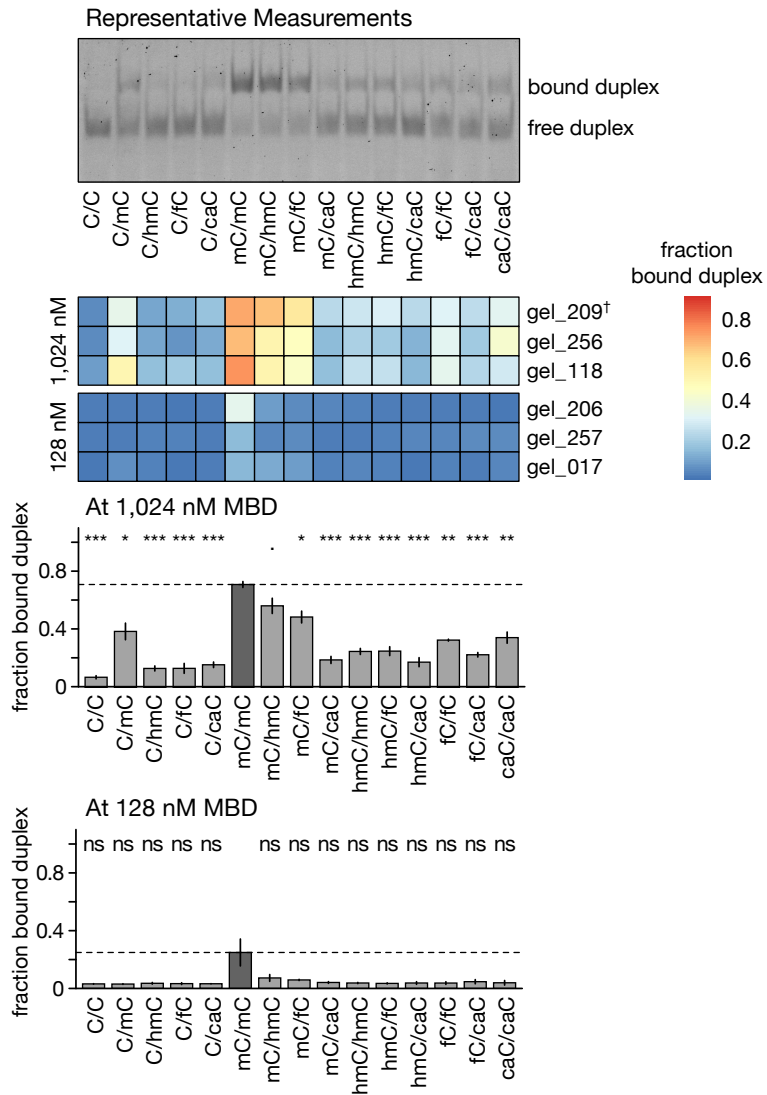

**Supplementary Figure 2. Selectivity measurements for human MBD2[145–225].** All details see Supplementary Figure 1.



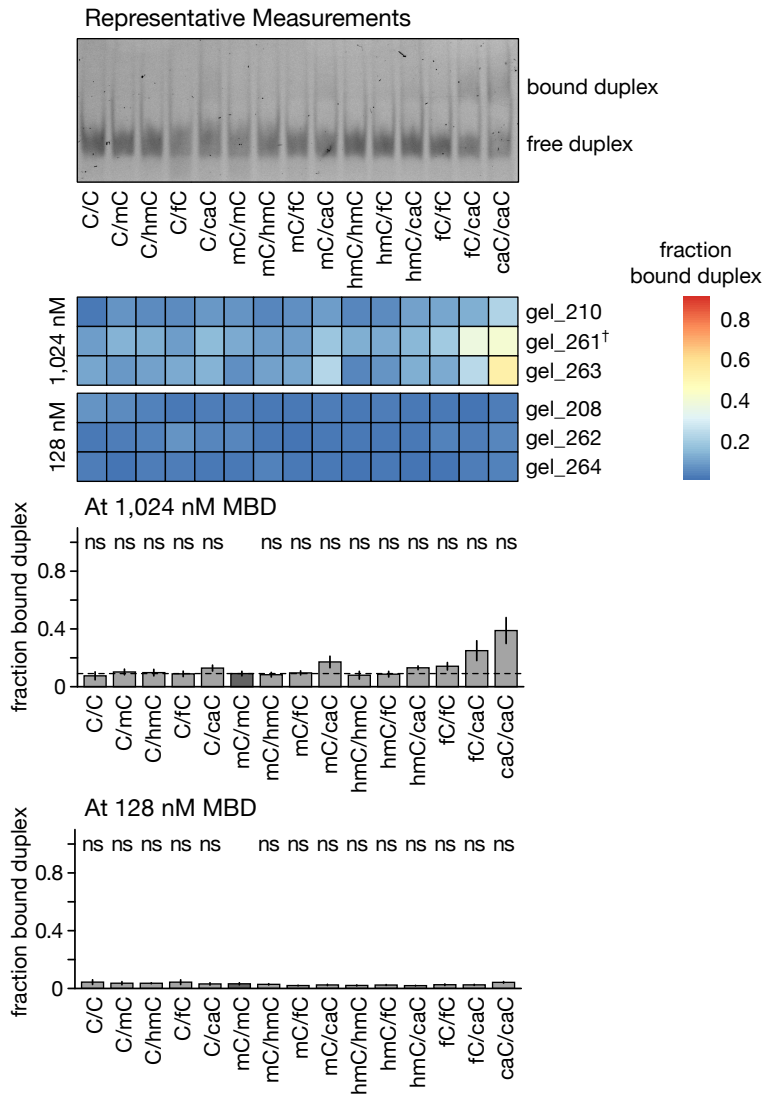

**Supplementary Figure 3. Selectivity measurements for human MBD3[2-81].** All details see Supplementary Figure 1.

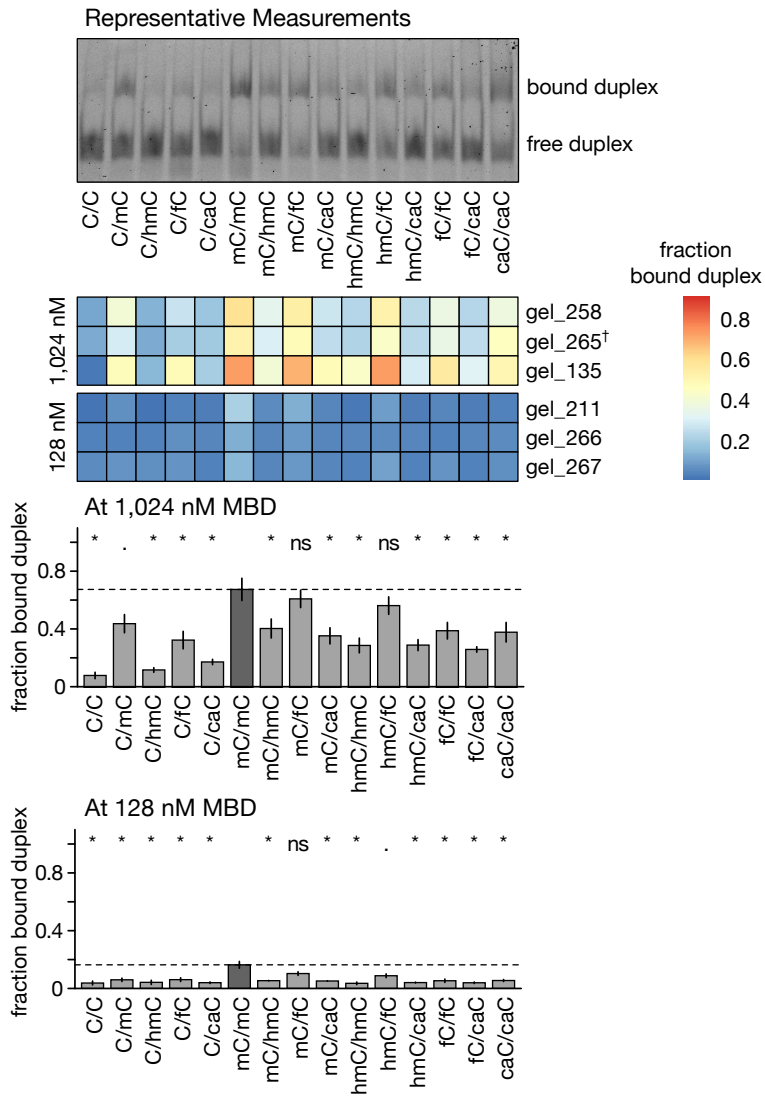

**Supplementary Figure 4. Selectivity measurements for human MBD4[76–167].** All details see Supplementary Figure 1.



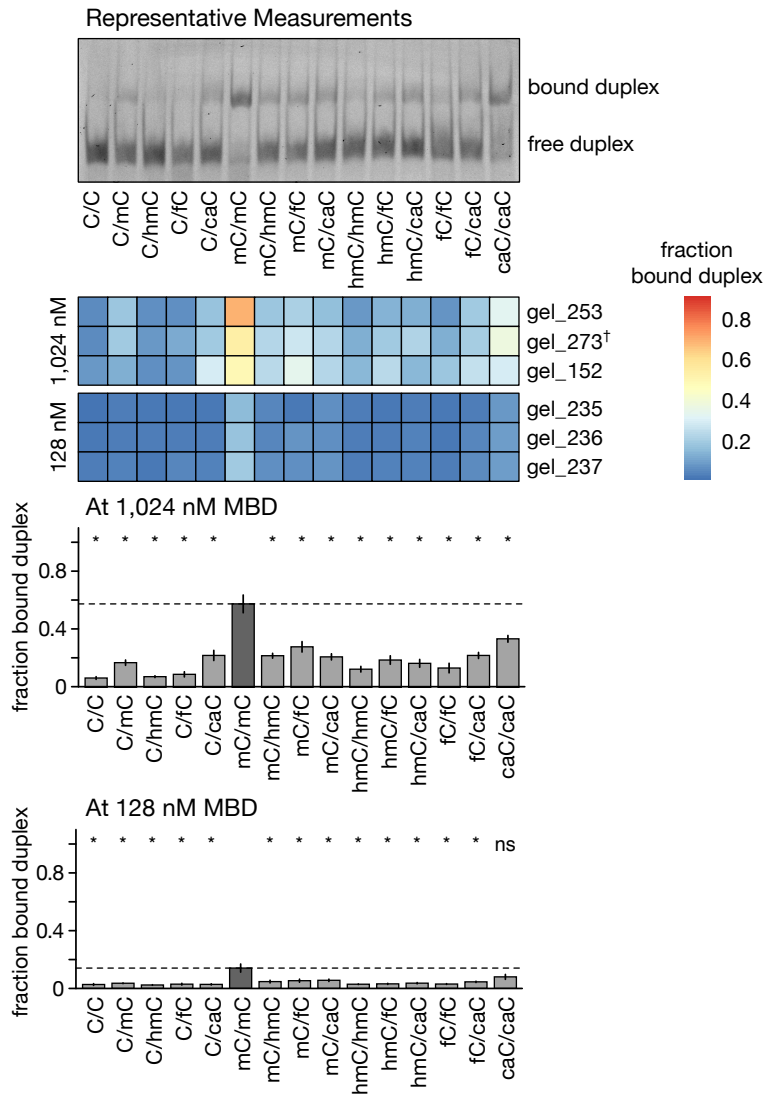

**Supplementary Figure 6. Selectivity measurements for human MeCP2[90–181]L124F.** All details see Supplementary Figure 1.



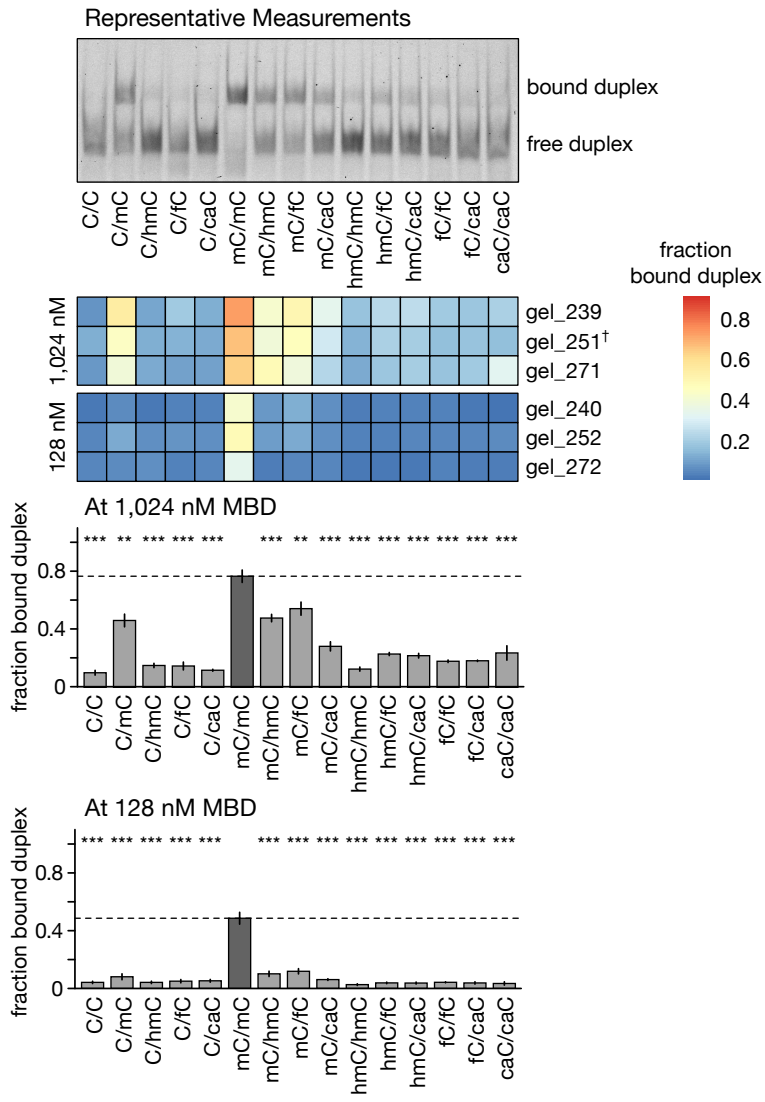

**Supplementary Figure 8. Selectivity measurements for human MeCP2[90–181]S134C.** All details see Supplementary Figure 1.

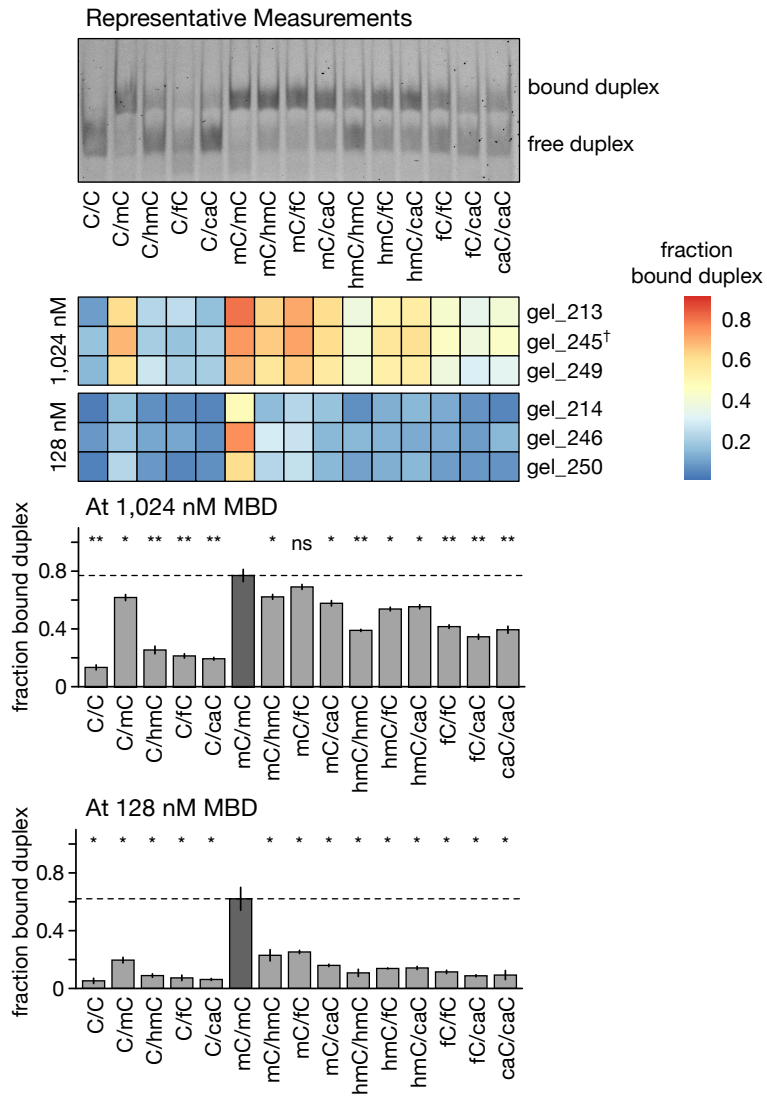

**Supplementary Figure 9. Selectivity measurements for human MeCP2[90–181]T158M.** All details see Supplementary Figure 1.

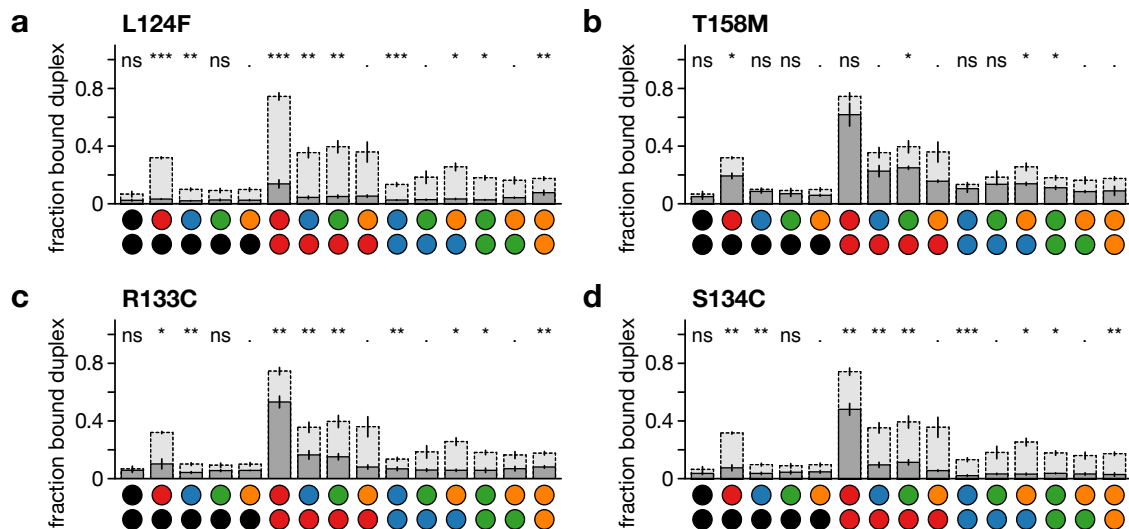

**Supplementary Figure 10. Altered selectivity profiles of MeCP2 Rett mutants at low protein concentration.** EMSA selectivity measurements of four Rett mutants in contrast to wildtype human MeCP2[90–181] (shown as light gray bars; see Supplementary Figure 5) at 128 nM MBD protein concentration. **(a)** In contrast to MeCP2[90–181]L124F (see Supplementary Figure 6); **(b)** In contrast to MeCP2[90–181]T158M (see Supplementary Figure 9); **(c)** In contrast to MeCP2[90–181]R133C (see Supplementary Figure 7); **(d)** In contrast to MeCP2[90–181]S134C (see Supplementary Figure 9). Duplex configurations in color code with the top row representing unlabeled strand and the bottom row the labeled strand (Supplementary Table X9; black: 2'-deoxycytidine, red: 5-methyl-2'-deoxycytidine, blue: 5-hydroxymethyl-2'-deoxycytidine, green: 5-formyl-2'-deoxycytidine, orange: 5-carboxy-2'-deoxycytidine). Error bars indicate standard error of the mean with two-sided Student's *t*-test against the fraction of bound mC/mC duplex (dark gray); false-discovery rate was controlled using the Benjamini-Hochberg procedure to correct the *p*-values for multiple comparisons (ns: *p* in (0.1, 1], . (0.05, 0.1], \* (0.01, 0.05], \*\* (0.001, 0.01], \*\*\* [0, 0.001]).



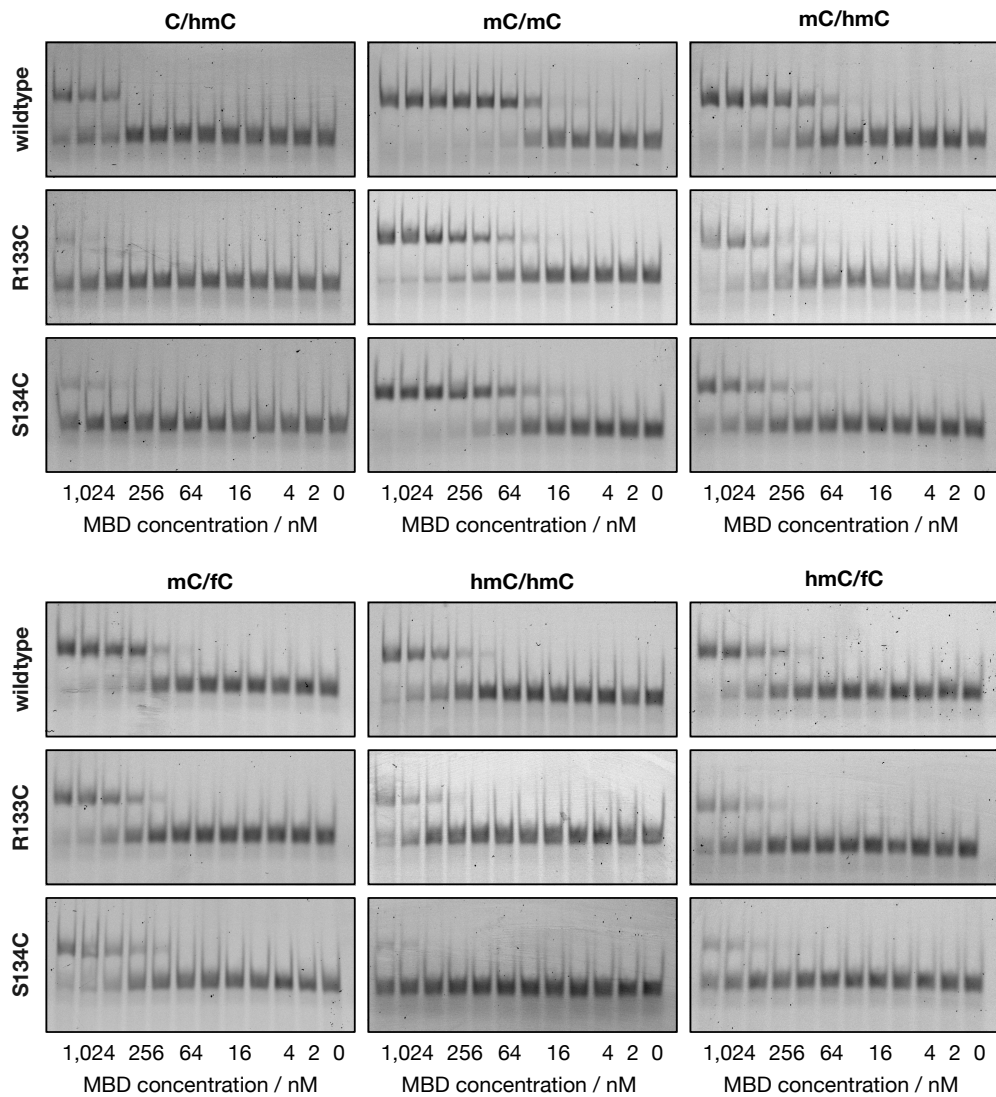

**Supplementary Figure 11. Affinity measurements of MeCP2 Rett mutants (Representative EMSA gel images).** EMSA gel images of a dilution series of MBD proteins at 2,048, 1,024, 512, 256, 128, 64, 32, 16, 8, 4, 2, and 0 nM with 2 nM of the labelled DNA duplexes containing the indicated 2'-deoxycytidine modifications.

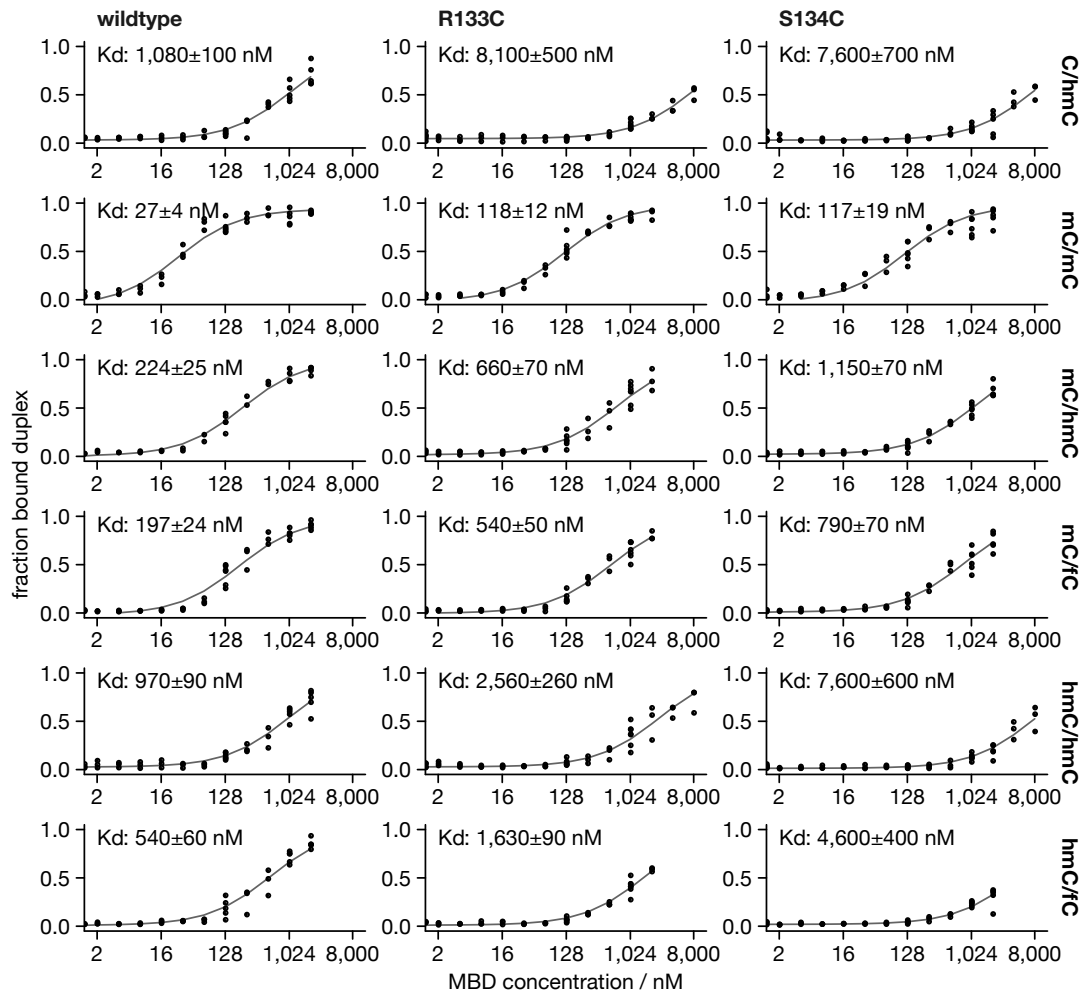

**Supplementary Figure 12. Affinity measurements of MeCP2 Rett mutants (Fitted curves).** Fitted fraction of bound labelled DNA duplex (see Supplementary Figure 11) as a function of MBD protein concentration (gray curves); non-linear least-square fit using the Levenberg-Marquardt algorithm (see Supplementary Table 6 and Methods for details). Best estimate of the dissociation constant  $K_d$  with standard error of mean given.

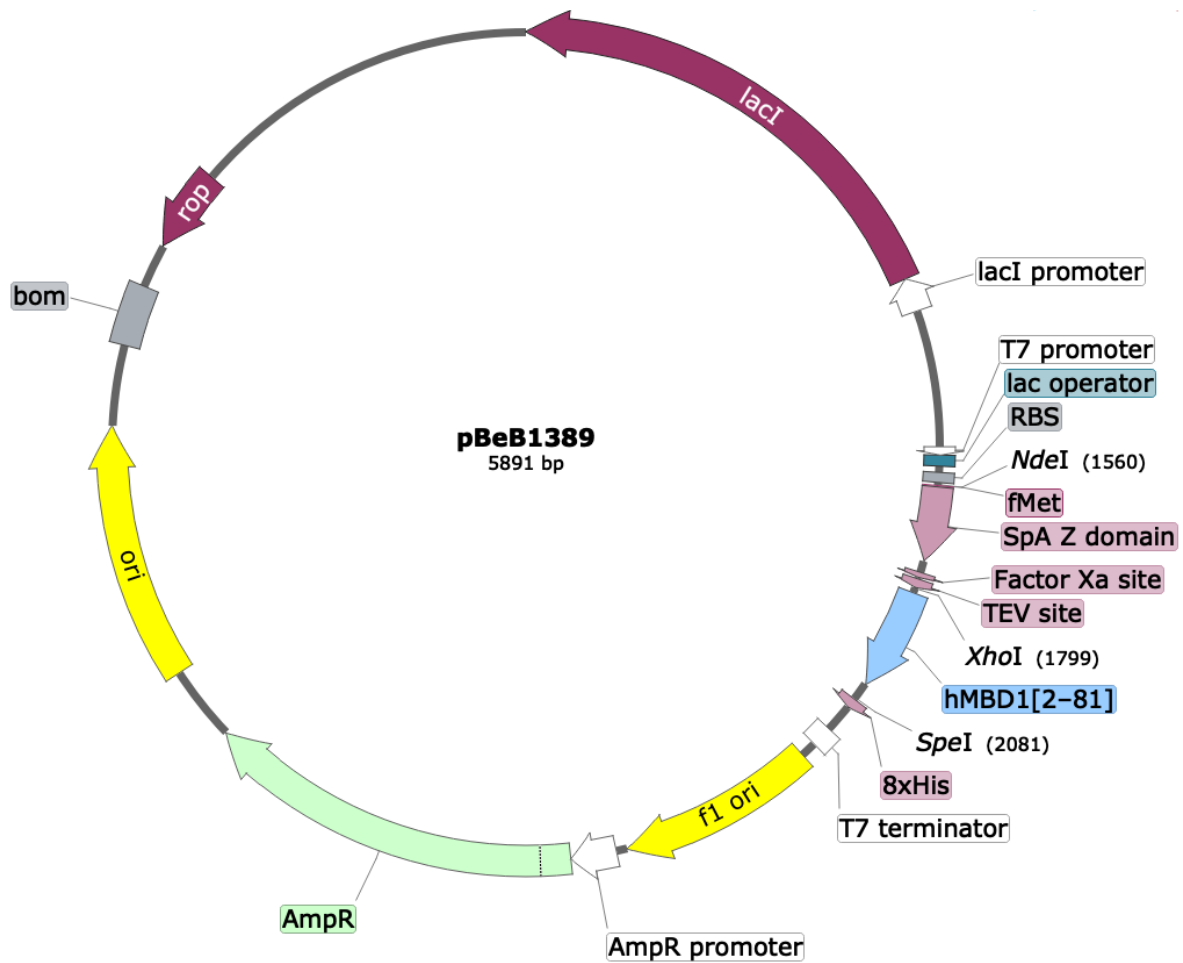

**Supplementary Figure 13. Sample plasmid map of pBeB1380 with hMBD1[2-81].** The fusion protein translates into a 20 kDa fusion protein as MDNKFNKEQQNAFYEILHLPNLNEEQR NAFIQLKDDPSQSANLLAEAKKLNDAPKVDAGSGSGSIEGRLENLYFQSLEAEDWLDPCALGP GWKRREVFRKSGATCGRSDTYYSPTGDIRIRSKVELTRYLGPACDLTLDFDKQGILCYPAPKAHPV AVTSHHHHHHHH\*. Figure created with SnapGene software (GSL Biotech).

|           | hMBD1 |   |   | hMBD2 |   |   | hMBD3 |   |   | control |   |   |
|-----------|-------|---|---|-------|---|---|-------|---|---|---------|---|---|
| MBD       | +     | + | + | +     | + | + | +     | + | + | -       | - | - |
| TEV       | -     | + | - | -     | + | - | -     | + | - | -       | + | - |
| Factor Xa | -     | - | + | -     | - | + | -     | - | + | -       | - | + |
| mC/mC     | +     | + | + | +     | + | + | +     | + | + | +       | + | + |

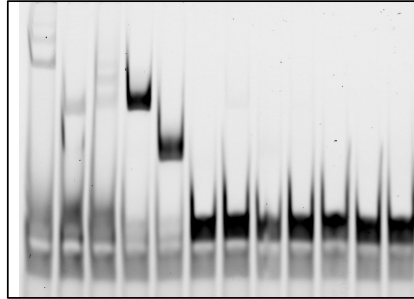

|           | hMBD4 |   |   | hMeCP2 |   |   | control |   |   |
|-----------|-------|---|---|--------|---|---|---------|---|---|
| MBD       | +     | + | + | +      | + | + | -       | - | - |
| TEV       | -     | + | - | -      | + | - | -       | + | - |
| Factor Xa | -     | - | + | -      | - | + | -       | - | + |
| mC/mC     | +     | + | + | +      | + | + | +       | + | + |

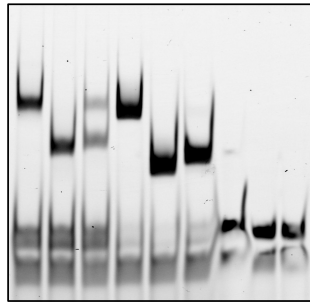

**Supplementary Figure 14. Effect of TEV cleavage on SpA(Z)-MBD fusion proteins.** EMSA at 4 nM labelled DNA duplex (with excess labelled strand, lowest immobile band) containing an mC/mC modified CpG with the indicated SpA(Z)-MBD fusion proteins at 1  $\mu$ M MBD concentration (except for hMBD1, which was re-expressed for all other assays in this study).

## Supplementary Tables

**Supplementary Table 1. Plasmids.**

|                 |                                         |
|-----------------|-----------------------------------------|
| <b>pBeB1380</b> | pET(21d)-SpA(Z)-[Factor Xa]-[TEV]-6xHis |
| <b>pBeB1389</b> | pBeB1380-hMBD1[2-81]-8xHis              |
| <b>pBeB1390</b> | pBeB1380-hMBD2[146-225]-8xHis           |
| <b>pBeB1391</b> | pBeB1380-hMBD3[2-81]-8xHis              |
| <b>pBeB1392</b> | pBeB1380-hMBD4[76-167]-8xHis            |
| <b>pBeB1393</b> | pBeB1380-hMeCP2[90-181]-8xHis           |
| <b>pDaH1642</b> | pBeB1380-hMeCP2[90-181]S134C-8xHis      |
| <b>pDaH1643</b> | pBeB1380-hMeCP2[90-181]L124F-8xHis      |
| <b>pDaH1644</b> | pBeB1380-hMeCP2[90-181]R133C-8xHis      |
| <b>pDaH1645</b> | pBeB1380-hMeCP2[90-181]T158M-8xHis      |

**Supplementary Table 2. Oligodeoxynucleotides for plasmid construction.**

**pBeB1380 (pET(21d)-SpA(Z)-[Factor Xa]-[TEV]-6xHis)**

|                  |                                                                                        |
|------------------|----------------------------------------------------------------------------------------|
| <b>o2872_fwd</b> | ctttaagaaggagatatacatatgGACAACAAATTCACAAAGAACAACAAAACGC                                |
| <b>o2873_rev</b> | agtgggtgggtgggtgggtgctcgagagactgaaaataaagattttcagccttcctc gatagaaccactgccagatcccgcgctc |

**pBeB1389 (hMBD1[2-81])**

|                  |                                                                                                                                                                                                                                                           |
|------------------|-----------------------------------------------------------------------------------------------------------------------------------------------------------------------------------------------------------------------------------------------------------|
| <b>o2878</b>     | <u>GCAGAAGACTGGTTGGACTGTCCAGCTTTAGGTCCAGGTTGGAAACGCCGTGAGGTGTTTCGTAAGTCTGGTGC AACGTGCGGTCGCTCCGATACCTACTACCAGTCACCTACCGGTGACCGCATTTCGCTCTAAGGTAGAATTGACCC GCTATCTTGGCCCGCCTGCGATCTGACCTTATTTCGATTTCAAACAGGGTATCTTGTGTTACCCCGGCCAAA GCGCATCCCGTAGCAGTG</u> |
| <b>o2879_fwd</b> | aaatctttattttcagtcctcgcagGCAGAAGACTGGTTGGACTG                                                                                                                                                                                                             |
| <b>o2880_rev</b> | gtgggtgggtgggtgggtgactagtcACTGCTACGGGATGCG                                                                                                                                                                                                                |

**pBeB1390 (hMBD2[146-225])**

|                  |                                                                                                                                                                                                                                                        |
|------------------|--------------------------------------------------------------------------------------------------------------------------------------------------------------------------------------------------------------------------------------------------------|
| <b>o2881</b>     | <u>TCAGGCAAACGTATGGATTGCCCGCACTGCCTCCCGGATGGAAAAAGGAGGAGGTAATTCGCAAGTCAGGCCT TAGTGCCGGCAAATCCGATGTATATTATTTCTCACCTAGTGGCAAGAAGTTTCGCTCAAAACCACAGTTAGCAC GTTATTTGGGTAATACGGTTGACTTGCTCGTTTCGATTTCCGTACCGGTAATGATGCCATCGAAATTACAG AAGAATAAGCAACGCTTG</u> |
| <b>o2882_fwd</b> | aaatctttattttcagtcctcgcagTCAGGCAAACGTATGGATTG                                                                                                                                                                                                          |
| <b>o2883_rev</b> | gtgggtgggtgggtgggtgactagtcAAGCGTTGCTTATTCTTC                                                                                                                                                                                                           |

**pBeB1391 (hMBD3[2–81])**

|                  |                                                                                                                                                                                                                                                      |
|------------------|------------------------------------------------------------------------------------------------------------------------------------------------------------------------------------------------------------------------------------------------------|
| <b>o2884</b>     | <u>GAACGCAAACGCTGGGAATGCCAGCTTTACCTCAAGGATGGGAACGCGAGGAGGTTCTCGCCGCTCAGGCCCTTCCGCCGGCCATCGTGACGTATTTTACTACTCGCCTTCGGGAAAGAAATTCGGCTCAAACCACAGTTAGCGCGTTACCTGGGAGGATCTATGGATTTGTCTACCTTCGACTTTCGCACCGGTAAAATGCTGATGAGCAAGATGAATAAATCTCGTCAACGCGTG</u> |
| <b>o2885_fwd</b> | aaatctttatntttcagtcctctcgagGAACGCAAACGCTGGGAATG                                                                                                                                                                                                      |
| <b>o2886_rev</b> | gtggtggtggtggtggtgactagtcACGCGTTGACGAGATTTATTC                                                                                                                                                                                                       |

**pBeB1392 (hMBD4[76–167])**

|                  |                                                                                                                                                                                                                                                                                         |
|------------------|-----------------------------------------------------------------------------------------------------------------------------------------------------------------------------------------------------------------------------------------------------------------------------------------|
| <b>o2884</b>     | <u>GCGACCGCAGGTACAGAGTGCCGTAAGTCAGTTCCTGTGGGTGGGAGCGCGTTGTCAAGCAACGCTTGTTGGTAAAACAGCCGGCGTTTCGATGTTTACTTTATCTCGCCGCAAGGCCTAAAGTTCCGTTCCAAGTCATCACTTGCTAACTATTTACACAAAAACGGTGAACCTCCCTTAAACCGGAAGACTTTGACTTCACTGTGTTAAGCAAGCGTGGTATCAAAGCCGCTACAAGGACTGCTCAATGGCAGCATTAAACATCCCATCTC</u> |
| <b>o2885_fwd</b> | aaatctttatntttcagtcctctcgagGCGACCGCAGGTACAGAG                                                                                                                                                                                                                                           |
| <b>o2886_rev</b> | gtggtggtggtggtggtgactagtcGAGATGGGATGTTAATGCTGCC                                                                                                                                                                                                                                         |

**pBeB1393 (hMeCP2[90–181])**

|                  |                                                                                                                                                                                                                                                                                           |
|------------------|-------------------------------------------------------------------------------------------------------------------------------------------------------------------------------------------------------------------------------------------------------------------------------------------|
| <b>o2890</b>     | <u>GATCGTGGTCCTATGTATGATGATCCAACACTTCCTGAGGGCTGGACCCGTAAATTGAAGCAACGCAAATCCGGTCGCAGCGCCGGCAAGTATGATGTGTATCTTATCAATCCCAAGGGAAGGCATTTTCGAGTAAGGTGGAGTTGATCGCATACTTCGAGAAAGTGGGTGATACATCTCTGGACCCTAATGACTTCGATTTTACCGTAACTGGGCGTGGAAGCCCTTCGCGTCGCGAGCAGAAACCCCTAAAAAGCCAAAATCACCCAAAGCT</u> |
| <b>o2891_fwd</b> | aaatctttatntttcagtcctctcgagGATCGTGGTCCTATGTATG                                                                                                                                                                                                                                            |
| <b>o2892_rev</b> | gtggtggtggtggtggtgactagtcAGCTTTGGGTGATTTTGG                                                                                                                                                                                                                                               |

**pDaH1642 (hMeCP2[90–181] variant S134C)**

|                  |                                     |
|------------------|-------------------------------------|
| <b>o3118_fwd</b> | aagggaaggcatttcgcTgtaaggtggagttgatc |
| <b>o3119_rev</b> | gatcaactccaccttacAgcgaaatgccttcctt  |

**pDaH1642 (hMeCP2[90–181] variant L124F)**

|                  |                                         |
|------------------|-----------------------------------------|
| <b>o3120_fwd</b> | cggcaagtatgatgtgatTttatcaatccccaagggaa  |
| <b>o3121_rev</b> | ttcccttggggattgataaAatacacatcatacttgccg |

**pDaH1642 (hMeCP2[90–181] variant R133C)**

|                  |                                |
|------------------|--------------------------------|
| <b>o3122_fwd</b> | ccccaaggaaggcatttTgcagtaaggtgg |
| <b>o3123_rev</b> | ccaccttactgcAaaatgccttccttgggg |

**pDaH1642 (hMeCP2[90–181] variant T158M)**

|                  |                                         |
|------------------|-----------------------------------------|
| <b>o3124_fwd</b> | cctaatacttcgattttaccgtaaTggggcgtggaagcc |
| <b>o3125_rev</b> | ggcttccacgcccAttacggtaaaatcgaagtcattagg |

**Supplementary Table 3. MBD protein sequences.**

**hMBD1[2–81] (CCDS59318.1)**

AEDWLDCPALGPGWKRREVFRKSGATCGRSDTYYSPTGDRIIRSKVELTRYLGPACDLTLDFDKQGILC  
YPAPKAHPVAV

**hMBD2[146–225] (CCDS11953.1)**

SGKRMDCPALPPGWKKEEVIRKSGLSAGKSDVYYFSPSGKKFRSKPQLARYLGNTVDLSSFDFTGKM  
MPSKLQKNKQRL

**hMBD3[2–81] (CCDS12072.1)**

ERKRWECPALPQGWEREVPRRSGLSAGHRDVFYSPSGKKFRSKPQLARYLGGSMDLSTDFDFTGK  
MLMSKMNKSQRV

**hMBD4[76–167] (CCDS3058.1)**

ATAGTECRKSVPCGWERVVKQRLFGKTAGRFDVYFISPQGLKFRSKSSLANYLHKNGETSLKPEDFDFT  
VLSKRGIKSRYKDCSMAALTSHL

**hMeCP2[90–181] (CCDS14741.1)**

DRGPMYDDPTLPEGWTRKLRKSGRSAGKYDVYLNLPQGKAFRSKVELIAYFEKVGDTSLDPNDFDFT  
VTGRGSPSRREQPPKKPKSPKA

**Supplementary Table 4. Oligodeoxynucleotides (ODNs) for EMSA.**

|              |                               |                                      |
|--------------|-------------------------------|--------------------------------------|
| <b>o2968</b> | AAAAAAAAAAAAAAAAAAAAAAAAA     |                                      |
| <b>o2969</b> | TTTTTTTTTTTTTTTTTTTTTTTT      |                                      |
| <b>o2903</b> | AAAAAAAAAAACGAAAAAAAAA        |                                      |
| <b>o2904</b> | TTTTTTTTTTTCGTTTTTTTTTT       |                                      |
| <b>o2906</b> | [6-FAM]AAAAAAAAAAACGAAAAAAAAA |                                      |
| <b>o2967</b> | [6-FAM]AAAAAAAA[X]GAAAAAAAAA  | X = 5-methyl-2'-deoxycytidine        |
| <b>o2909</b> | TTTTTTTTTTT[X]GTTTTTTTTTT     | X = 5-methyl-2'-deoxycytidine        |
| <b>o3115</b> | [6-FAM]AAAAAAAA[X]GAAAAAAAAA  | X = 5-hydroxymethyl-2'-deoxycytidine |
| <b>o3112</b> | TTTTTTTTTTT[X]GTTTTTTTTTT     | X = 5-hydroxymethyl-2'-deoxycytidine |
| <b>o3116</b> | [6-FAM]AAAAAAAA[X]GAAAAAAAAA  | X = 5-formyl-2'-deoxycytidine        |
| <b>o3113</b> | TTTTTTTTTTT[X]GTTTTTTTTTT     | X = 5-formyl-2'-deoxycytidine        |
| <b>o3117</b> | [6-FAM]AAAAAAAA[X]GAAAAAAAAA  | X = 5-carboxy-2'-deoxycytidine       |
| <b>o3114</b> | TTTTTTTTTTT[X]GTTTTTTTTTT     | X = 5-carboxy-2'-deoxycytidine       |



**Supplementary Table 5. ODN pairs for EMSA.** See Supplementary Table X8 for ODN sequences.

| <b>Probe</b>        | <b>6-FAM labeled strand</b> |      | <b>unlabeled strand</b> |      |
|---------------------|-----------------------------|------|-------------------------|------|
| <i>binding trap</i> | o2968                       | none | o2969                   | none |
| <i>p01</i>          | o2906                       | C    | o2904                   | C    |
| <i>p02</i>          | o2967                       | mC   | o2904                   | C    |
| <i>p03</i>          | o3115                       | hmC  | o2904                   | C    |
| <i>p04</i>          | o3116                       | fC   | o2904                   | C    |
| <i>p05</i>          | o3117                       | caC  | o2904                   | C    |
| <i>p06</i>          | o2967                       | mC   | o2909                   | mC   |
| <i>p07</i>          | o3115                       | hmC  | o2909                   | mC   |
| <i>p08</i>          | o3116                       | fC   | o2909                   | mC   |
| <i>p09</i>          | o3117                       | caC  | o2909                   | mC   |
| <i>p10</i>          | o3115                       | hmC  | o3112                   | hmC  |
| <i>p11</i>          | o3116                       | fC   | o3112                   | hmC  |
| <i>p12</i>          | o3117                       | caC  | o3112                   | hmC  |
| <i>p13</i>          | o3116                       | fC   | o3113                   | fC   |
| <i>p14</i>          | o3117                       | caC  | o3113                   | fC   |
| <i>p15</i>          | o3117                       | caC  | o3114                   | caC  |

**Supplementary Table 6. Fit statistics.** Summary statistic of fits shown in Supplementary Figure 12 and Figure 3g–i. logLik: log<sub>10</sub>-likelihood; AIC: Akaike information criterion; BIC: Bayesian information criterion; df: degrees of freedom; CI: confidence interval.

| Assay     |       |      | Non-least square fit |            |        |         |         |          |             |
|-----------|-------|------|----------------------|------------|--------|---------|---------|----------|-------------|
| Protein   | Probe | Gels | Sigma                | Convergent | logLik | AIC     | BIC     | Deviance | Residual df |
| wildtype  | p03   | 3    | 0.0591               | TRUE       | 61.64  | -117.28 | -112.00 | 0.14     | 41          |
| wildtype  | p06   | 3    | 0.0764               | TRUE       | 50.58  | -95.15  | -89.87  | 0.24     | 41          |
| wildtype* | p06   | 3    | 0.0595               | TRUE       | 62.41  | -114.82 | -106.01 | 0.14     | 39          |
| wildtype  | p07   | 2    | 0.0514               | TRUE       | 49.03  | -92.06  | -87.76  | 0.08     | 29          |
| wildtype  | p08   | 3    | 0.0679               | TRUE       | 55.67  | -105.33 | -100.05 | 0.19     | 41          |
| wildtype  | p10   | 3    | 0.0582               | TRUE       | 62.33  | -118.66 | -113.37 | 0.14     | 41          |
| wildtype  | p11   | 3    | 0.0681               | TRUE       | 54.25  | -102.49 | -97.28  | 0.19     | 40          |
| R133C     | p03   | 6    | 0.0369               | TRUE       | 98.82  | -191.64 | -185.78 | 0.07     | 50          |
| R133C     | p06   | 3    | 0.0548               | TRUE       | 64.87  | -123.74 | -118.45 | 0.12     | 41          |
| R133C     | p07   | 3    | 0.0686               | TRUE       | 55.24  | -104.48 | -99.20  | 0.19     | 41          |
| R133C     | p08   | 3    | 0.0535               | TRUE       | 65.88  | -125.75 | -120.47 | 0.12     | 41          |
| R133C     | p10   | 6    | 0.0683               | TRUE       | 66.81  | -127.61 | -121.76 | 0.23     | 50          |
| R133C     | p11   | 3    | 0.0359               | TRUE       | 83.07  | -160.15 | -154.86 | 0.05     | 41          |
| S134C     | p03   | 6    | 0.0520               | TRUE       | 82.51  | -159.01 | -153.10 | 0.14     | 51          |
| S134C     | p06   | 3    | 0.0885               | TRUE       | 45.28  | -84.56  | -79.20  | 0.33     | 42          |
| S134C     | p07   | 3    | 0.0405               | TRUE       | 79.66  | -153.32 | -147.97 | 0.07     | 42          |
| S134C     | p08   | 3    | 0.0599               | TRUE       | 62.49  | -118.98 | -113.63 | 0.15     | 42          |
| S134C     | p10   | 6    | 0.0443               | TRUE       | 90.97  | -175.94 | -170.03 | 0.10     | 51          |
| S134C     | p11   | 3    | 0.0373               | TRUE       | 83.25  | -160.51 | -155.15 | 0.06     | 42          |

| Assay     |       |      | Estimates |        |           |         | 95% CI  |       | Relative estimates |       | 95% CI |  |
|-----------|-------|------|-----------|--------|-----------|---------|---------|-------|--------------------|-------|--------|--|
| Protein   | Probe | Gels | Kd        | SEM    | statistic | lower   | upper   | Kd    | SEM                | lower | upper  |  |
| wildtype  | p03   | 3    | 1078.88   | 100.93 | 10.69     | 897.76  | 1295.48 | 40.57 | 10.54              | 25.65 | 64.05  |  |
| wildtype  | p06   | 3    | 26.59     | 3.85   | 6.91      | 20.23   | 35.00   | 1.00  | 0.37               | 0.58  | 1.73   |  |
| wildtype* | p06   | 3    | 29.29     | 2.27   | 12.89     | 25.11   | 34.23   | 1.00  | 0.62               | 0.73  | 1.36   |  |
| wildtype  | p07   | 2    | 224.18    | 24.61  | 9.11      | 181.56  | 277.39  | 8.43  | 2.22               | 5.19  | 13.71  |  |
| wildtype  | p08   | 3    | 197.00    | 24.04  | 8.20      | 157.68  | 246.53  | 7.41  | 1.95               | 4.51  | 12.19  |  |
| wildtype  | p10   | 3    | 967.10    | 89.64  | 10.79     | 806.38  | 1157.97 | 36.36 | 9.45               | 23.04 | 57.25  |  |
| wildtype  | p11   | 3    | 541.33    | 62.73  | 8.63      | 436.90  | 667.67  | 20.35 | 5.30               | 12.48 | 33.01  |  |
| R133C     | p03   | 6    | 8113.50   | 526.58 | 15.41     | 7115.53 | 9292.79 | 68.78 | 5.84               | 49.20 | 96.48  |  |
| R133C     | p06   | 3    | 117.97    | 11.79  | 10.01     | 96.31   | 144.62  | 1.00  | 0.12               | 0.67  | 1.50   |  |
| R133C     | p07   | 3    | 660.22    | 72.89  | 9.06      | 531.87  | 816.15  | 5.60  | 0.48               | 3.68  | 8.47   |  |
| R133C     | p08   | 3    | 543.14    | 47.98  | 11.32     | 456.78  | 644.06  | 4.60  | 0.40               | 3.16  | 6.69   |  |
| R133C     | p10   | 6    | 2555.93   | 261.19 | 9.79      | 2066.16 | 3173.48 | 21.67 | 1.84               | 14.29 | 32.95  |  |
| R133C     | p11   | 3    | 1627.88   | 93.44  | 17.42     | 1454.67 | 1825.17 | 13.80 | 1.18               | 10.06 | 18.95  |  |
| S134C     | p03   | 6    | 7569.67   | 660.58 | 11.46     | 6387.07 | 9043.24 | 64.96 | 3.51               | 36.93 | 114.40 |  |
| S134C     | p06   | 3    | 116.53    | 18.54  | 6.29      | 79.05   | 172.96  | 1.00  | 0.08               | 0.46  | 2.19   |  |
| S134C     | p07   | 3    | 1149.66   | 71.64  | 16.05     | 1014.80 | 1301.84 | 9.87  | 0.55               | 5.87  | 16.47  |  |
| S134C     | p08   | 3    | 790.04    | 74.95  | 10.54     | 651.16  | 954.99  | 6.78  | 0.38               | 3.76  | 12.08  |  |
| S134C     | p10   | 6    | 7627.15   | 568.44 | 13.42     | 6604.58 | 8859.12 | 65.45 | 3.53               | 38.19 | 112.07 |  |
| S134C     | p11   | 3    | 4644.37   | 354.75 | 13.09     | 3994.79 | 5460.87 | 39.86 | 2.15               | 23.10 | 69.08  |  |

\* Binding of MeCP2 to probe p06 (mC/mC) is more likely to follow a binding model with Hill slope (with  $h = 1.91 \pm 0.24$ ), which does however not significantly impact the Kd estimate (at a significance level of 0.05).
